# Supplementary material
Source: Springer Nature journal article supplement (https://www.springermedizin.de/resource/supplementary/13054_2010_8816_MOESM3_ESM.pdf/9732638)

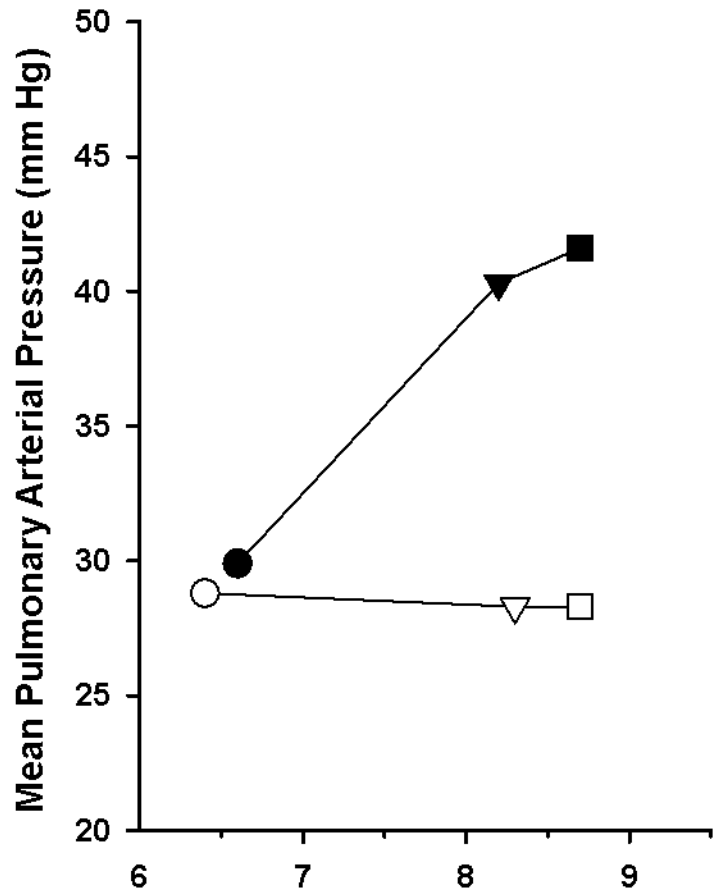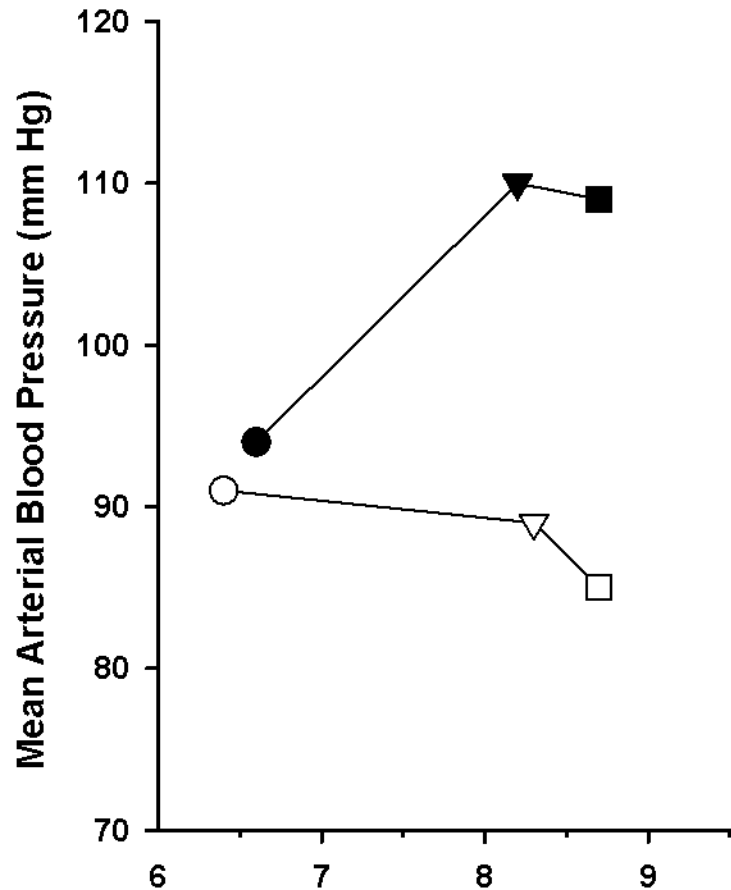

Cardiac Output (l/min)

Supplement: MOESM3 [file 9732638]
